# Supplementary material
Source: HighWire-hosted journal article supplement (https://www.rsfjournal.org/highwire/filestream/4833/field_highwire_adjunct_files/0/Owens_ONLINE_APPENDIX-562022_rev4232023-FINAL_SUBMITTED.docx)
Supplement: Owens_ONLINE_APPENDIX-562022_rev4232023-FINAL_SUBMITTED.docx [file Owens_ONLINE_APPENDIX-562022_rev4232023-FINAL_SUBMITTED.docx]

**ONLINE APPENDIX.**

**Sample Restrictions and Trimming**

Of the 11,450 children present at all seven waves between the fall of kindergarten and 5th grade, best practices guide several sample restrictions for identifying the relationship between an ADHD diagnosis and future wellbeing. First, although sensitivity analyses indicated that results are *robust to their inclusion*, 100 twins and higher-order births are excluded in the main analyses because they are at higher risk of poor health and because the presence of a twin may influence behavior reports differently than among singleton births (Royer 2009). Second, 300 *undiagnosed* children who are present in the 5th grade sample but whose aggregate behavior problems score falls below that of any diagnosed child (i.e., below the area of common support of the diagnosed sample) are excluded (i.e., “trimmed” or “pruned”) from analyses because they cannot be suitable matches for diagnosed children (Iacus, King and Porro 2011) (see Appendix Figure A.1). Iacus, King and Porro (2011) argue that “the key goal of matching is to prune observations from the data so that the remaining data have better balance between the treated [i.e., diagnosed] and control [i.e., undiagnosed] groups, meaning that the empirical distributions of the covariates (X) in the groups are more similar” (p. 2). This results in a 5th grade sample of 11,050 children.

Of the remaining 11,050 children, 9.6% (N=1,060) lack information on the outcome variables or ADHD diagnosis and 6.8% (N=760) lack information on race/ethnicity, reducing the working sample to 9,230 children. Although guided by best practices, it is nonetheless important to note that sensitivity analyses reveal that results are robust even barring these exclusions. Finally, of these 9,230 children, 5.7% (N=530) are of ‘other’ race/ethnicity—likely predominantly Asian. Because the substantive focus of this study is on diagnostic effects among Black, Hispanic, and White children, these 530 children are excluded from the analyses. Counts of children by race/ethnicity and diagnosis/medication treatment status are displayed in **Appendix Table A.1.**

**Propensity Score Matching (PSM) Details**

Subsequent to CEM, the PSM estimation strategy proceeds in four steps. First, propensity scores for the probability of diagnosis with or without subsequent medication receipt are generated for every child in the sample using the logistic regression in equation 1:

(1)

Here, is the underlying probability of diagnosis with or without subsequent medication receipt, is a vector of covariates including all pre-diagnosis behavioral, cognitive, family, school/classroom, and demographic variables shown in **Table 1** and listed above, and is a vector of corresponding regression coefficients. Second, diagnosed and undiagnosed children are matched using their estimated propensity scores using nearest neighbor matching with replacement. While different matching strategies carry a trade-off between bias and efficiency, nearest neighbor matching with replacement maximizes opportunities for strong matches and withstands increased standard errors due to matching with only one nearest neighbor (Caliendo and Kopeinig 2008). Third, balance statistics are examined to ensure strong matches on each covariate used to estimate the propensity score (sample balance statistics are shown in **Appendix Table A.2**). Fourth, average treatment effects on the treated (ATT), , or differences in the outcomes (Y) of matched pairs of diagnosed (D=1) and undiagnosed (D=0) children, are estimated, per equation 2:

(2)

**Additional Covariates Included in the PSM Equation**

To help ensure that diagnosed and undiagnosed children are as comparable as possible on observed characteristics, 34 child, family, and school context factors measured in kindergarten and shown in Table 1 are included in the propensity score matching model. Because we focus on the individual child level controls in the main text, here we address the included potential family and school confounders.

At the level of families and parenting, there are also a number of biological confounders of diagnosis and future wellbeing, including: maternal mental health (i.e., depressive symptoms) and age and child low birth weight status (Chi and Hinshaw 2002; Klebanov, Brooks-Gunn and McCormick 1994; Lesesne, Visser and White 2003). Families who engage in intensive parenting and/or concerted cultivation may also be more likely to view diagnosis as a way of connecting children to resources like medication and/or educational accommodations (e.g., extra testing time) (King, Jennings and Fletcher 2014). This study includes measures developed in prior studies to help capture these parenting tendencies (Bodovski and Farkas 2008; Cheadle 2008).

There are also a number of established classroom, school, and geographic confounders: being in a special education versus a general education classroom (Bussing, Zima and Belin 1998), attending a school facing mandated state consequential educational accountability pressures (Bokhari and Schneider 2011), and region of residence (Hinshaw and Scheffler 2014). Finally, to help address possible reference group effects–for example, due to better average behavior in the classes attended by middle- and upper-SES children–we also adjust for teacher ratings of the average behavior of students in their class.

**Supplementary Analyses: Robustness Checks and Testing of an Alternative Explanation**

Results appear robust and systematic. However, even among individuals with the same observed characteristics, factors including parental social capital, other resources, and perceptions of disability, can lead to racial/ethnic differences in illness progression – includingthe ability/decision to be evaluated by a medical professional, possible diagnosis, and possible treatment (Pescosolido and Boyer 1999).

We control for many of these differences by matching onfactors including social class, pre-diagnosis ADHD-related behavioral severity, baseline academic achievement, average teacher-rated classroom behavior, and measures of parental concerted cultivation. But, additional unobserved differences that influence selection into diagnosis *within* race/ethnicity, pre-diagnosis behavioral severity groups, etc. may still lead to biased estimates. To address this possibility, we conduct two supplemental analyses. First, we conduct a bounding exercise to estimate the extent to which our estimates would have to be biased in order to invalidate our findings. Results summarized in **Appendix Table A.3** reveal that, depending on the group and outcome under consideration, estimates would have to be biased by between 2% on the low end (for teacher ratings of ‘diagnosed and medicated’ Black children’s externalizing problems) to 69% on the high end (for ‘diagnosed and medicated’ White children’s self-competence) to invalidate our findings. Estimates are most sensitive to the risk of unobserved confounding for ‘diagnosed and medicated’ Black children, likely because the relatively small pool of (N=820) potential undiagnosed Black matches yields somewhat poorer quality matches even with these best-available data.

Second, matching is conducted *only among the 20.3% (N=1,770) sample children who were evaluated by a medical professional for a learning difficulty, some of whom were ultimately diagnosed and others of whom were not* (including ADD/ADHD). This restriction creates extremely conservative estimates of diagnostic effects as all undiagnosed ‘control’ cases (i.e., potential matches) also received an evaluation by a medical professional for a learning difficulty. Estimates shown in **Appendix Table A.4** indicate that magnitudes of diagnostic effects remain substantively unchanged relative to those reported in the main text, with one exception. Namely, the lower perceived self-competence of diagnosed White children is no longer statistically significant. Broadly, however, formal diagnosis rather than simply the evaluation appears necessary to drive the negative effects of diagnosis on teacher behavior ratings and parent educational expectations. This makes sense since teachers are less likely to be aware that a child was evaluated than they are to know if a child actually received a diagnosis.

Third, to examine the robustness of our results to alternate specifications of our outcome, we transform our teacher- and child-rated outcomes into binary variables that equal 0 when the teacher/child reports 0 or 1 and 1 when they report 2 or 3 based on the original 0-3 scales. We find that the same pattern of results documented in the main text persists when we use these binary versions of our outcomes, as shown in **Appendix Table A.5**.

| **Appendix Table A.1. Counts of Children by Race/Ethnicity, ADHD Diagnostic Status, and Medication Receipt/Non-Receipt Following Diagnosis (N=8,700)** | | | |
| --- | --- | --- | --- |
|  | Undiagnosed (N=7,880) | Diagnosed (N=820) | |
|  | Medication | No Medication |
| Black | 820 | 80 | 50 |
| Hispanic | 2,660 | 90 | 70 |
| White | 4,400 | 340 | 190 |
| *Notes:* Counts rounded to the nearest 10 in compliance with NCES restricted-data reporting requirements. *Source:* ECLS-K:2011 children who were eligible for sampling and present at all survey waves used, who had complete information on ADD/ADHD diagnosis, race/ethnicity (excluding 'other'), and the outcome measures, and whose composite ADHD-related behaviors score prior to diagnosis did not fall below that of the diagnosed child with the least severe pre-diagnosis composite score or above that of the diagnosed child with the most severe pre-diagnosis composite score. | | | |

| **Appendix Table A.2. Balance Statistics for PSM Model Estimating Net Marginal "Effect" of ADHD Diagnosis with Medication Treatment on Later Positive Learning-Related Behaviors in 5th Grade among Black Children (N=900)** | | | | | |
| --- | --- | --- | --- | --- | --- |
| Variable | Unmatched (U)/ Matched (M) | Treated | Control | t-statistic (treated-control) | p>|t| |
| Inattentive Behaviors Score in Wave Prior to Diagnosis or 1st Grade if Undiagnosed (Teacher) | U | 0.80 | 0.19 | 5.82 | 0.000 |
| M | 0.80 | 0.90 | -0.77 | 0.440 |
| Hyperactive Behaviors Score in Wave Prior to Diagnosis or 1st Grade if Undiagnosed (Teacher) | U | 0.79 | 0.18 | 7.05 | 0.000 |
| M | 0.79 | 0.81 | -0.10 | 0.922 |
| ODD or CD Behaviors Score in Wave Prior to Diagnosis or 1st Grade if Undiagnosed (Teacher) | U | 0.76 | 0.15 | 7.59 | 0.000 |
| M | 0.76 | 0.80 | -0.34 | 0.732 |
| Internalizing Behavior Problems Score in Wave Prior to Diagnosis or 1st Grade if Undiagnosed (Teacher) | U | 0.32 | 0.08 | 3.21 | 0.001 |
| M | 0.32 | 0.30 | 0.26 | 0.797 |
| Inattentive Behaviors Score in Wave Prior to Diagnosis or 1st Grade if Undiagnosed (Parent) | U | 0.55 | 0.08 | 4.59 | 0.000 |
| M | 0.55 | 0.39 | 1.17 | 0.243 |
| Hyperactive Behaviors Score in Wave Prior to Diagnosis or 1st Grade if Undiagnosed (Parent) | U | 0.82 | 0.09 | 8.46 | 0.000 |
| M | 0.82 | 0.81 | 0.10 | 0.920 |
| ODD or CD Behaviors Score in Wave Prior to Diagnosis or 1st Grade if Undiagnosed (Parent) | U | 0.43 | .043 | 5.43 | 0.000 |
| M | 0.43 | 0.31 | 1.07 | 0.285 |
| Reading Score in Kindergarten (std.) | U | -0.59 | -0.11 | -4.66 | 0.000 |
| M | -0.59 | -0.66 | 0.60 | 0.551 |
| Math Score in Kindergarten (std.) | U | -0.85 | -0.32 | -5.54 | 0.000 |
| M | -0.85 | -0.97 | 1.02 | 0.308 |
| Teacher Rating of Classroom Average Behavior of Students in the Class in Kindergarten | U | 2.18 | 2.26 | -0.87 | 0.382 |
| M | 2.18 | 2.25 | -0.57 | 0.568 |
| Child Received Any Special Education Services in Kindergarten | U | .25 | 0.08 | 5.05 | 0.000 |
| M | .25 | 0.21 | 0.56 | 0.577 |
| Child Age at Kindergarten Entry (in Months) | U | 65.18 | 65.47 | -0.48 | 0.633 |
| M | 65.18 | 65.93 | -0.98 | 0.328 |
| Parental Intervention in School in Kindergarten | U | 3.53 | 3.76 | -1.34 | 0.180 |
| M | 3.53 | 3.26 | 0.98 | 0.328 |
| Child Activities and Structured Leisure Time in Kindergarten | U | 2.80 | 3.04 | -1.16 | 0.245 |
| M | 2.80 | 2.59 | 0.76 | 0.446 |
| Parent Perceptions of Responsibilities Towards Child Cognitive & Social Development in Kindergarten | U | 17.26 | 16.98 | 0.55 | 0.585 |
| M | 17.26 | 15.84 | 2.14 | 0.034 |
| Number of Books at Home in Kindergarten | U | 51.48 | 54.65 | -0.43 | 0.665 |
| M | 51.48 | 40.94 | 1.04 | 0.301 |
| Child's Cognitive Stimulation in Kindergarten | U | 13.44 | 13.04 | 0.65 | 0.518 |
| M | 13.44 | 11.83 | 2.03 | 0.044 |
| Parent Educational Expectations for Child in Kindergarten | U | -0.07 | 0.00 | -1.54 | 0.125 |
| M | -0.07 | -0.06 | -0.15 | 0.884 |
| Male | U | 0.66 | 0.53 | 2.28 | 0.023 |
| M | 0.66 | 0.71 | -0.68 | 0.498 |
| Lower-class1 | U | 0.50 | 0.33 | 2.97 | 0.003 |
| M | 0.50 | 0.56 | -0.79 | 0.431 |
| Middle-class1 | U | 0.43 | 0.53 | -1.73 | 0.084 |
| M | 0.43 | 0.33 | 1.31 | 0.194 |
| Child Been in Childcare Outside Home in Kindergarten | U | 0.34 | 0.24 | 1.83 | 0.068 |
| M | 0.34 | 0.36 | -0.33 | 0.742 |
| Number of Other Children in Household in Kindergarten | U | 1.64 | 1.55 | 0.60 | 0.547 |
| M | 1.64 | 1.59 | 0.27 | 0.789 |
| Child Born Weighing Less than 5.5 lbs (LBW) | U | 0.18 | 0.13 | 1.18 | 0.239 |
| M | 0.18 | 0.19 | -0.20 | 0.839 |
| Current Mother Age at Kindergarten Round | U | 33.15 | 33.05 | 0.10 | 0.918 |
| M | 33.15 | 32.15 | 0.76 | 0.450 |
| Mother has CES-D Score >9 (Clinically Depressive Symptoms) | U | 0.29 | 0.21 | 1.63 | 0.103 |
| M | 0.29 | 0.34 | -0.68 | 0.498 |
| Single Mother in Household in Kindergarten2 | U | 0.53 | 0.52 | 0.06 | 0.951 |
| M | 0.53 | 0.53 | 0.00 | 1.000 |
| Social Father in Household in Kindergarten2 | U | 0.08 | 0.05 | 1.27 | 0.206 |
| M | 0.08 | 0.07 | 0.15 | 0.877 |
| Other Family Type in Household in Kindergarten2 | U | 0.10 | 0.05 | 2.20 | 0.028 |
| M | 0.10 | 0.08 | 0.40 | 0.689 |
| Lives in Midwest in Kindergarten3 | U | 0.21 | 0.24 | -0.55 | 0.583 |
| M | 0.21 | 0.21 | -0.00 | 1.000 |
| Lives in West in Kindergarten3 | U | 0.08 | 0.05 | 0.86 | 0.391 |
| M | .075 | 0.06 | 0.31 | 0.757 |
| Lives in Northeast in Kindergarten3 | U | 0.13 | 0.18 | -1.27 | 0.204 |
| M | 0.13 | 0.08 | 1.05 | 0.295 |
| 1 Reference is "Upper-class." 2 Reference is "Two biological parents in household." 3 Reference is "South." *Notes:* a predictor for "child not covered by insurance" was additionally included but dropped because no diagnosed Black children were not covered by insurance. *Source:* ECLS-K:2011. | | | | | |

| **Appendix Table A.3. How Biased Would the Significant Estimated "Average Marginal Relationship" Need to Be to Invalidate the Finding?** | | | | | | | | | | | | | |
| --- | --- | --- | --- | --- | --- | --- | --- | --- | --- | --- | --- | --- | --- |
|  |  | **Positive Approaches to Learning (Teacher Report) - 5th Grade** | | | **Externalizing Behavior Problems (Teacher Report) - 5th Grade** | | | **Perceived Self-Competence (Child Report) - 5th Grade** | | | **Parent Educational Expectations for Child (Parent Report) - 5th Grade** | | |
|  |  | (1) | (2) | (3) | (4) | (5) | (6) | (7) | (8) | (9) | (10) | (11) | (12) |
|  |  | B | H | W | B | H | W | B | H | W | B | H | W |
| Diagnosed with ADHD, Receiving Medication | % Bias to Invalidate | 11.7% |  |  | 1.9% |  |  |  |  | 68.6% | 6.5% | 34.6% | 41.2% |
| Estimate (SE) | -0.20 (0.09) |  |  | 0.18 (0.09) |  |  |  |  | -0.25 (0.04) | -0.21 (0.10) | -0.45 (0.15) | -0.20 (0.06) |
| Diagnosed with ADHD, Not Receiving Medication | % Bias to Invalidate | 59.9% |  | 30.0% | 32.5% |  | 18.3% |  |  | 16.0% | 20.0% | 28.1% |  |
| Estimate (SE) | -0.44 (0.09) |  | -0.14 (0.05) | 0.32 (0.11) |  | 0.12 (0.05) |  |  | -0.14 (0.06) | 0.27 (0.11) | -0.30 (0.11) |  |
| *Notes:* B=Black, H=Hispanic, W=White. The estimates and standard errors displayed above come from Table 3 and are based on the propensity score matching estimates with coarsened exact matching described in the main text.  *Source:* ECLS-K:2011. Multiple imputation was used to produce 20 datasets to address item-missingness on variables other than the outcomes and ADHD diagnosis. | | | | | | | | | | | | | |

| **Appendix Table A.4. Average Marginal Relationships Between an ADHD Diagnosis and Future Teacher-Rated School Behaviors, Child Perceived Self-Competence, and Parent Educational Expectations among Children who were Evaluated and Diagnosed ("Treated Cases") versus Evaluated but Not Diagnosed ("Control Cases/Matches"), by Race/Ethnicity (N=1,770)** | | | | | | | | | | | | |
| --- | --- | --- | --- | --- | --- | --- | --- | --- | --- | --- | --- | --- |
|  | **Positive Approaches to Learning (Teacher Report) - 5th Grade** | | | **Externalizing Behavior Problems (Teacher Report) - 5th Grade** | | | **Perceived Self-Competence (Child Report) - 5th Grade** | | | **Parent Educational Expectations for Child (Parent Report) - 5th Grade** | | |
|  | (1) | (2) | (3) | (4) | (5) | (6) | (7) | (8) | (9) | (10) | (11) | (12) |
|  | Black  (N=220) | Hispanic (N=430) | White (N=1,120) | Black  (N=220) | Hispanic (N=430) | White (N=1,120) | Black  (N=220) | Hispanic (N=430) | White (N=1,120) | Black  (N=220) | Hispanic (N=430) | White (N=1,120) |
| Diagnosed with ADHD | -0.30**a,b | 0.06b | -0.04a | 0.29**b | -0.02b | 0.06 | -0.02 | 0.08 | -0.08 | -0.06b | -0.63***b,c | -0.02c |
| (0.10) | (0.07) | (0.06) | (0.11) | (0.10) | (0.06) | (0.11) | (0.08) | (0.05) | (0.16) | (0.14) | (0.09) |
| *p<0.05, **p<0.01, ***p<0.001. aSignificant difference between Black and White at p<0.05. bSignificant difference between Black and Hispanic at p<0.05. cSignificant difference between Hispanic and White at p<0.05. *Notes:* Displaying propensity score matching estimates with coarsened exact matching on (1) race/ethnicity (3 groups), (2) severity of pre-diagnosis behavioral problems (in quartiles) of the parent- and teacher-rated subscales for inattentive or hyperactive/impulsive behavioral type (16 groups) and (3) child sex (2 groups). Standard errors in parentheses. Propensity scores generated from pre-diagnosis or kindergarten child, family, and school characteristics shown in Table 1. Models estimate the "average marginal effect" of ADHD diagnosis without consideration of medication use or non-use following diagnosis (in all cases compared to undiagnosed children).  *Source:* ECLS-K:2011 children who were eligible for sampling and present at all waves used in the analyses, who had complete information on ADD/ADHD diagnosis, race/ethnicity, and the outcome measures, and whose composite pre-diagnosis ADHD-related behaviors score did not fall below that of the diagnosed child with the least severe pre-diagnosis ADHD-related behaviors composite score or above that of the diagnosed child with the most severe pre-diagnosis ADHD-related behaviors composite score. Multiple imputation was used to produce 20 datasets to address item-missingness on variables other than the outcomes and ADHD diagnosis. | | | | | | | | | | | | |

| **Appendix Table A.5. Average Marginal Relationships Between an ADHD Diagnosis and *Poor* Future Teacher-Rated Behaviors or *High* Perceived Self-Competence (i.e., Using Binary Outcomes), by Race/Ethnicity and Medication Treatment Status (N=8,700)** | | | | | | | | | |
| --- | --- | --- | --- | --- | --- | --- | --- | --- | --- |
|  | **Positive Approaches to Learning (Teacher Report) - 5th Grade** | | | **Externalizing Behavior Problems (Teacher Report) - 5th Grade** | | | **Perceived Self-Competence (Child Report) - 5th Grade** | | |
|  | (1) | (2) | (3) | (4) | (5) | (6) | (7) | (8) | (9) |
|  | Black  (N=950) | Hispanic (N=2,820) | White (N=4,930) | Black  (N=950) | Hispanic (N=2,820) | White (N=4,930) | Black  (N=950) | Hispanic (N=2,820) | White (N=4,930) |
| Diagnosed with ADHD, Receiving Medication | -0.25***a | -0.09 | -0.06a | 0.20***a,b | 0.02b | 0.04a | 0.12a | -0.01c | -0.12***a,c |
| (0.06) | (0.05) | (0.04) | (0.05) | (0.05) | (0.03) | -0.06 | (0.03) | (0.03) |
| Diagnosed with ADHD, Not Receiving Medication | -0.35***a,b | 0.05b | -0.07a | 0.18**a,b | -0.06b | 0.02a | 0.02 | 0.03 | -0.08* |
| (0.07) | (0.06) | (0.04) | (0.07) | (0.04) | (0.03) | (0.06) | (0.06) | (0.03) |
| *p<0.05, **p<0.01, ***p<0.001. aSignificant difference between White and Black at p<0.05. bSignificant difference between Hispanic and Black at p<0.05. cSignificant difference between White and Hispanic at p<0.05. ♰ Significant within-model difference by medication treatment status at p<0.05. *Notes:* Using binary outcomes that equal 0 when the teacher/child answers with a 0 or 1 and that equal 1 when they answer with a 2 or 3. Displaying propensity score matching estimates with coarsened exact matching on (1) race/ethnicity (3 groups), (2) severity of pre-diagnosis behavioral problems (in quartiles) of the parent- and teacher-rated subscales for inattentive or hyperactive/impulsive behavioral type (16 groups) and (3) child sex (2 groups). Standard errors in parentheses. Propensity scores generated from pre-diagnosis or kindergarten child, family, and school characteristics shown in Table 1. Models separately estimate the "average marginal effect" of ADHD diagnosis for children who subsequently receive medication and those who do not (in all cases compared to undiagnosed children).  *Source:* ECLS-K:2011. Multiple imputation was used to produce 20 datasets to address item-missingness on variables other than the outcomes and ADHD diagnosis. | | | | | | | | | |

**Appendix Figure A.1. Distributions of Average Pre-Diagnosis ADHD-Related Behavior Scores of Diagnosed and Undiagnosed Children**


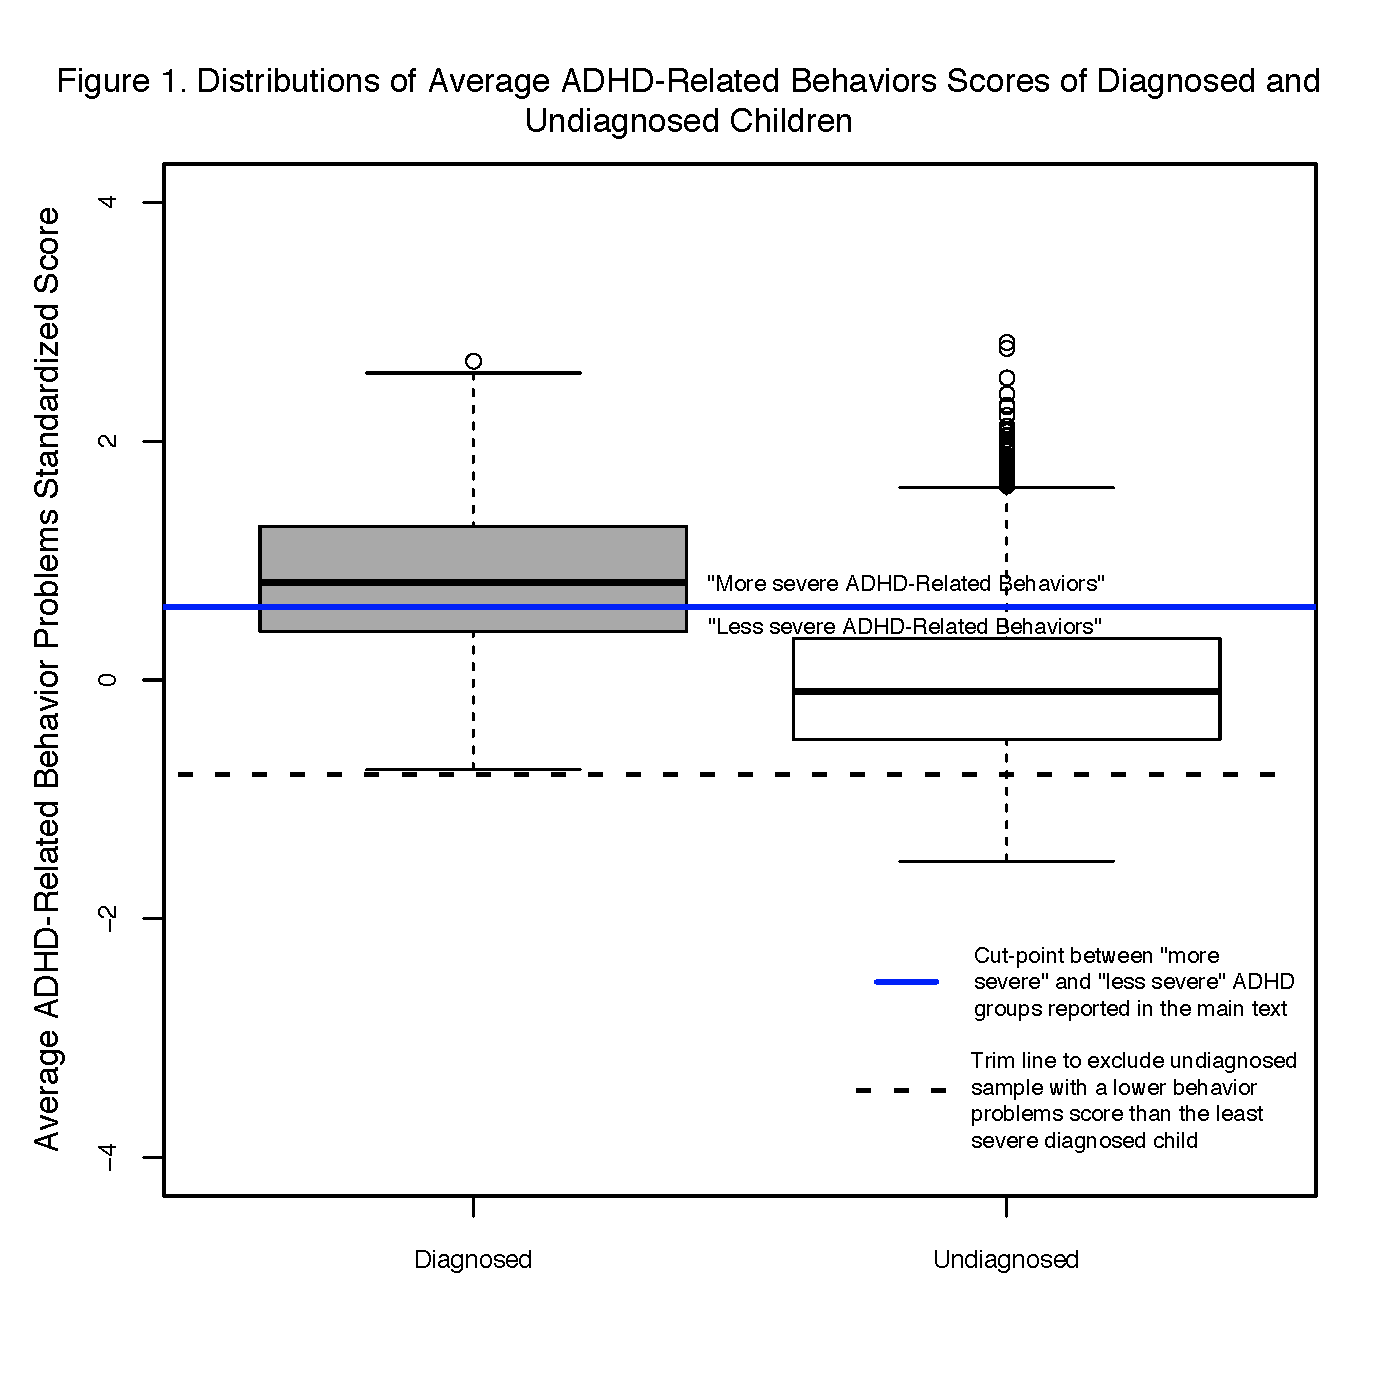


*Source:* ECLS-K:2011.

**REFERENCES**

Bodovski, Katerina, and George Farkas. 2008. "“Concerted Cultivation” and Unequal Achievement in Elementary School." *Social Science Research* 37(3):903-19.

Bokhari, Farasat A.S., and Helen Schneider. 2011. "School Accountability Laws and the Consumption of Psychostimulants." *Journal of Health Economics* 30(2):355-72.

Bussing, Regina, Bonnie T. Zima, and Thomas R. Belin. 1998. "Differential Access to Care for Children with ADHD in Special Education Programs." *Psychiatric Services* 49(9):1226-29.

Caliendo, Marco, and Sabine Kopeinig. 2008. "Some Practical Guidance for the Implementation of Propensity Score Matching." *Journal of Economic Surveys* 22(1):31-72.

Cheadle, Jacob E. 2008. "Educational Investment, Family Context, and Children's Math and Reading Growth from Kindergarten through the Third Grade." *Sociology of Education* 81(1):1-31.

Chi, Terry C., and Stephen P. Hinshaw. 2002. "Mother–Child Relationships of Children with ADHD: The Role of Maternal Depressive Symptoms and Depression-Related Distortions." *Journal of abnormal child psychology* 30(4):387-400.

Hinshaw, Stephen P., and Richard M. Scheffler. 2014. *The ADHD Explosion: Myths, Medication, Money, and Today's Push for Performance*: Oxford University Press.

Iacus, Stefano M., Gary King, and Giuseppe Porro. 2011. "Multivariate Matching Methods that are Monotonic Imbalance Bounding." *Journal of the American Statistical Association* 106(493):345-61.

King, Marissa D., Jennifer Jennings, and Jason M. Fletcher. 2014. "Medical Adaptation to Academic Pressure: Schooling, Stimulant Use, and Socioeconomic Status." *American Sociological Review* 79(6):1039-66.

Klebanov, Pamela Kato, Jeanne Brooks-Gunn, and Marie C. McCormick. 1994. "Classroom Behavior of Very Low Birth Weight Elementary School Children." *Pediatrics* 94(5):700-08.

Lesesne, Catherine A., Susanna N. Visser, and Carla P. White. 2003. "Attention-Deficit/Hyperactivity Disorder in School-Aged Children: Association with Maternal Mental Health and Use of Health Care Resources." *Pediatrics* 111(Supplement 1):1232-37.

Pescosolido, Bernice A., and Carol A. Boyer. 1999. "How do People Come to Use Mental Health Services? Current Knowledge and Changing Perspectives." in *A Handbook for the Study of Mental Health*, edited by A.V. Horowitz and T.L. Scheid. Cambridge, England: Cambridge University Press.

Royer, Heather. 2009. "Separated at girth: US twin estimates of the effects of birth weight." *American Economic Journal: Applied Economics* 1(1):49-85.
